# Supplementary material
Source: publisher site journal article supplement (https://thieme-connect.com/media/10.1055-s-00035037/201603/supmat/10-3414-me14-01-0052-suppl1.pdf)
Supplement: Supplementary file 1 [file 10-3414-me14-01-0052-suppl1.pdf]

ANNEX 1

The following table presents the number of accesses in each workstation during the course.

|              | <i>Feb</i> | <i>Mar</i> | <i>Apr</i> | <i>May</i> | <i>Jun</i> | <i>Jul</i> | <i>Workstation<br/>Total</i> |
|--------------|------------|------------|------------|------------|------------|------------|------------------------------|
| ws1          | 11         | 16         | 11         | 13         | 18         | 16         | 85                           |
| ws2          | 9          | 10         | 13         | 16         | 18         | 15         | 81                           |
| ws3          | 10         | 11         | 15         | 12         | 10         | 11         | 69                           |
| ws4          | 15         | 12         | 12         | 14         | 11         | 16         | 80                           |
| ws5          | 17         | 19         | 14         | 14         | 17         | 17         | 98                           |
| ws6          | 13         | 14         | 16         | 17         | 18         | 19         | 97                           |
| ws7          | 10         | 11         | 17         | 11         | 13         | 23         | 85                           |
| ws8          | 11         | 9          | 12         | 13         | 15         | 14         | 74                           |
| ws9          | 11         | 12         | 12         | 13         | 14         | 16         | 78                           |
| ws10         | 11         | 10         | 13         | 10         | 15         | 16         | 75                           |
| ws11         | 12         | 16         | 18         | 17         | 19         | 14         | 96                           |
| ws12         | 14         | 19         | 16         | 15         | 11         | 18         | 93                           |
| ws13         | 10         | 14         | 9          | 11         | 13         | 21         | 78                           |
| ws14         | 11         | 13         | 12         | 14         | 18         | 17         | 85                           |
| ws15         | 8          | 8          | 15         | 17         | 13         | 19         | 80                           |
| ws16         | 10         | 16         | 18         | 19         | 14         | 18         | 95                           |
| ws17         | 13         | 12         | 21         | 13         | 12         | 18         | 89                           |
| ws18         | 12         | 13         | 14         | 11         | 15         | 20         | 85                           |
| ws19         | 12         | 16         | 17         | 12         | 18         | 19         | 94                           |
| ws20         | 13         | 11         | 10         | 12         | 13         | 15         | 74                           |
| ws21         | 12         | 16         | 15         | 11         | 15         | 19         | 88                           |
| server01     | 24         | 24         | 25         | 21         | 22         | 26         | 142                          |
| <b>Total</b> | <b>269</b> | <b>302</b> | <b>325</b> | <b>306</b> | <b>332</b> | <b>387</b> | <b>1921</b>                  |
